# Supplementary material
Source: Springer Nature journal article supplement (https://www.springermedizin.de/resource/supplementary/12879_2013_2926_MOESM4_ESM.pdf/9445376)
Supplement: MOESM4 [file 9445376]

All UMHS Patients  
on General Medicine Services  
n = 23,288

Had Sepsis in  
Administrative Records  
n = 3,146

No Sepsis by  
Administrative Records  
n = 20,142

Randomly Sampled for  
Chart Review  
n = 93

Randomly Sampled for  
Chart Review  
n = 18

Hospitalist-Confirmed  
Sepsis  
n = 61

Hospitalist-Confirmed  
Sepsis  
n = 3

Hospitalist-Confirmed Severe Sepsis  
(Included in the Analysis)  
n = 64
